# Supplementary material for: Economic Burden of Epilepsy in Rural Ituri, Democratic Republic of Congo
Source: PubMed Central journal article supplement — eClinicalMedicine. 2019 Mar 27;9:60–6. doi: 10.1016/j.eclinm.2019.03.010 (PMC6510724; doi:10.1016/j.eclinm.2019.03.010), 2019-03-27
Supplement: mmc1.pdf [file mmc1.pdf]

## Supplementary appendix 1

### Questionnaire for the evaluation of epilepsy cost

Name of PWE : \_\_\_\_\_ Code: OAE \_\_\_\_\_

Gender : \_\_\_\_\_ Age : \_\_\_\_\_ Profession: \_\_\_\_\_

Health Centre : \_\_\_\_\_

1. Monthly household income: \_\_\_\_\_
2. Number of medical consultations for epilepsy-related reasons per year: \_\_\_\_\_
3. Estimated financial cost per consultation: \_\_\_\_\_
4. Number of days of hospitalisation for epilepsy-related reasons per year: \_\_\_\_\_
5. Estimated financial cost per day of hospitalisation : \_\_\_\_\_
6. Estimated financial cost of paraclinical tests for epilepsy per year : \_\_\_\_\_
7. Estimated financial cost of antiepileptic drugs (AED) per month: \_\_\_\_\_
8. Estimated financial cost of transport (or motorbike fuel) per month for epilepsy-related ventures  
(transport to hospital for consultation or for AED purchase): \_\_\_\_\_
9. Estimated cost of traditional medicine per year (in cash and in kind): \_\_\_\_\_  
\_\_\_\_\_
10. Number of days of work lost per month by PWE because of seizures: \_\_\_\_\_
11. Number of days of work lost per month by caretaker because of PWE's seizures: \_\_\_\_\_
12. Other comments: \_\_\_\_\_  
\_\_\_\_\_

Date: \_\_\_\_\_

Name / signature of investigator: \_\_\_\_\_

## Supplementary appendix 2

### Annual direct cost of epilepsy in the DRC: Comparison of the reported cost with recommended care<sup>1,2</sup> cost

| Item                        | Weighted mean direct cost of epilepsy care per year in our study (USD) | Annual direct cost of recommended care <sup>1,2</sup> in USD (first year) | Annual direct cost of recommended care <sup>1,2</sup> in USD (subsequent years) |
|-----------------------------|------------------------------------------------------------------------|---------------------------------------------------------------------------|---------------------------------------------------------------------------------|
| Antiepileptic drugs         | 24.0                                                                   | 1.0 <sup>1</sup>                                                          | 1.0 <sup>1</sup>                                                                |
| Medical consultation        | 6.0                                                                    | 1.0*                                                                      | 0                                                                               |
| Hospitalization             | 4.8                                                                    | 2.4**                                                                     | 2.4                                                                             |
| Paraclinical investigations | 0                                                                      | 50***                                                                     | 0                                                                               |
| Transportation              | 3.6                                                                    | 3.6                                                                       | 3.6                                                                             |
| Traditional medicine        | 82.8                                                                   | 0                                                                         | 0                                                                               |
| Total                       | 121.2                                                                  | 58.0                                                                      | 7.0                                                                             |

\*One-time consultation to open a patient file, collect full medical history and initiate follow-up

\*\*Assumed to reduce by half upon initiating regular anti-epileptic drug therapy

\*\*\*One-time electroencephalogram (EEG) during the initial consultation to confirm diagnosis

## References

1. World Health Organisation. Epilepsy in the WHO African Region: Bridging the Gap. Geneva: WHO, 2004.
2. Chin JH. Epilepsy treatment in sub-Saharan Africa: closing the gap. *Afr Health Sci* 2012; **12**. DOI:10.4314/ahs.v12i2.17.
